# Supplementary material for: Sociodemographic predictors of COVID-19 vaccine hesitancy and main reasons against the vaccines in eastern Oslo: A cross-sectional study
Source: Research Square preprint supplement (doi:10.21203/rs.3.rs-1828398/v1), 2022-07-29
Supplement: Supplementary file 1 [file 3e5ef5da74edd8a2460d4f08.xlsx]

## Sheet: Sheet1
Table 5. Logistic regression predicting the likelihood of vaccine hesitancy due to main reasons based on sociodemographic predictors (N = 210)
Predictor variables		Risk of side effects	Too little experience	Not in risk group	No need	Natural immunity
		OR (95% CI)	OR (95% CI)	OR (95% CI)	OR (95% CI)	OR (95% CI)
Gender
Male		1.00 (Ref)	1.00 (Ref)	1.00 (Ref)	1.00 (Ref)	1.00 (Ref)
Female		1.99 (1.07-3.70)*	1.88 (1.02-3.46)*	1.09 (.59-2.01)	.78 (.42-1.45)	.67 (.35-1.26)
Age
18-29		1.00 (Ref)	1.00 (Ref)	1.00 (Ref)	1.00 (Ref)	1.00 (Ref)
30-44		1.83 (.80-4.16)	2.70 (1.16-6.25)*	.64 (.28-1.45)	.62 (.27-1.43)	1.59 (.65-3.89)
45-59		.88 (.30-2.54)	2.54 (.85-7.65)	.42 (.14-1.21)	.39 (.13-1.20)	1.26 (.39-4.00)
60+		1.21 (.37-3.92)	1.14 (.36-3.62)	.05 (.01-.26)***	.29 (.08-.97)*	1.20 (.34-4.20)
Born in Norway
Yes		1.00 (Ref)	1.00 (Ref)	1.00 (Ref)	1.00 (Ref)	1.00 (Ref)
No		.45 (.23-.87)*	.33 (.17-.64)**	.65 (.34-1.24)**	.56 (.29-1.09)	1.01 (.51-2.01)
Highest completed education
Primary (10, 7 year)		1.00 (Ref)	1.00 (Ref)	1.00 (Ref)	1.00 (Ref)	1.00 (Ref)
Higher general		3.56 (.90-14.06)	1.39 (.36-5.34)	.94 (.22-4.04)	2.35 (.51-10.89)	.82 (.22-3.08)
Higher vocational		1.31 (.31-5.59)	.45 (.10-2.03)	.97 (.20-4.67)	1.65 (.32-8.44)	.45 (.10-1.97)
Vocational school/vocational education (1/2-2 years) based on upper secondary vocational education		1.70 (.40-7.26)	1.40 (.32-6.13)	.72 (.15-3.39)	2.64 (.52-13.29)	.52 (.12-2.23)
University <= 4 years		1.51 (.40-5.64)	.88 (.23-3.32)	1.27 (.30-5.39)	1.35 (.30-6.12)	.42 (.11-1.62)
University > 4		1.34 (.35-5.08)	1.49 (.39-5.77)	1.19 (.28-5.07)	1.31 (.28-6.03)	.31 (.08-1.26)
Gross annual household income
Under 200.000 kroner		1.00 (Ref)	1.00 (Ref)	1.00 (Ref)	1.00 (Ref)	1.00 (Ref)
200.000-399.999 kroner		3.09 (.75-12.70)	.97 (.24-3.86)	2.70 (.54-13.52)	4.79 (.82-27.89)	.62 (.14-2.66)
400.000-599.999 kroner		1.59 (.42-6.03)	1.20 (.32-4.56)	5.80 (1.26-26.68)*	11.60 (2.09-64.42)**	1.58 (.42-6.00)
600.000-799.999 kroner		3.73 (91-15.36)	1.57 (.40-6.16)	4.10 (.87-19.32)	4.34 (.76-24.79)	1.03 (.26-4.12)
800.000-999.999 kroner		2.85 (.69-11.78)	1.70 (.42-6.89)	4.30 (.90-20.63)	4.34 (.75-25.21)	.58 (.13-2.58)
1.000.000-1.199.000 kroner		3.48 (.73-16.53)	1.96 (.42-9.18)	4.82 (.91-25.68)	2.66 (.40-17.68)	.99 (.20-4.79)
1.200.000-1.399.000 kroner		2.24 (.49-10.33)	1.28 (.28-5.82)	4.01 (.75-21.37)	7.77 (1.23-49.27)*	.64 (.13-3.29)
1.400.000 kroner or more		3.06 (.61-15.30)	1.53 (.31-7.57)	16.58 (2.58-106.78)**	32.90 (4.43-244.16)**	3.02 (.61-14.91)
Nagelkerke R2		.162	.196	.221	.218	.101
Notes. *p < .05; ** p < .01; *** p < .001.
Unanswered questions were excluded from analyses. This resulted in sometimes large numbers of missing cases in the analyses which mostly derived from blank answers on income (n = 876) and otherwise education (n = 54) or country of birth (n = 35).
